# Supplementary material for: Assessing the tsunami mitigation effectiveness of a planned Banda Aceh Outer Ring Road (BORR), Indonesia
Source: Copernicus journal article supplement (doi:10.5194/nhess-2018-276), 2018-10-23
Supplement: Supplementary file [file nhess-2018-276-AC2-supplement.pdf]

## Supplement Section

Response to Referee 1: Assessing the tsunami mitigation effectiveness of a planned Banda Aceh Outer Ring Road (BORR), Indonesia

by Syamsidik et al.

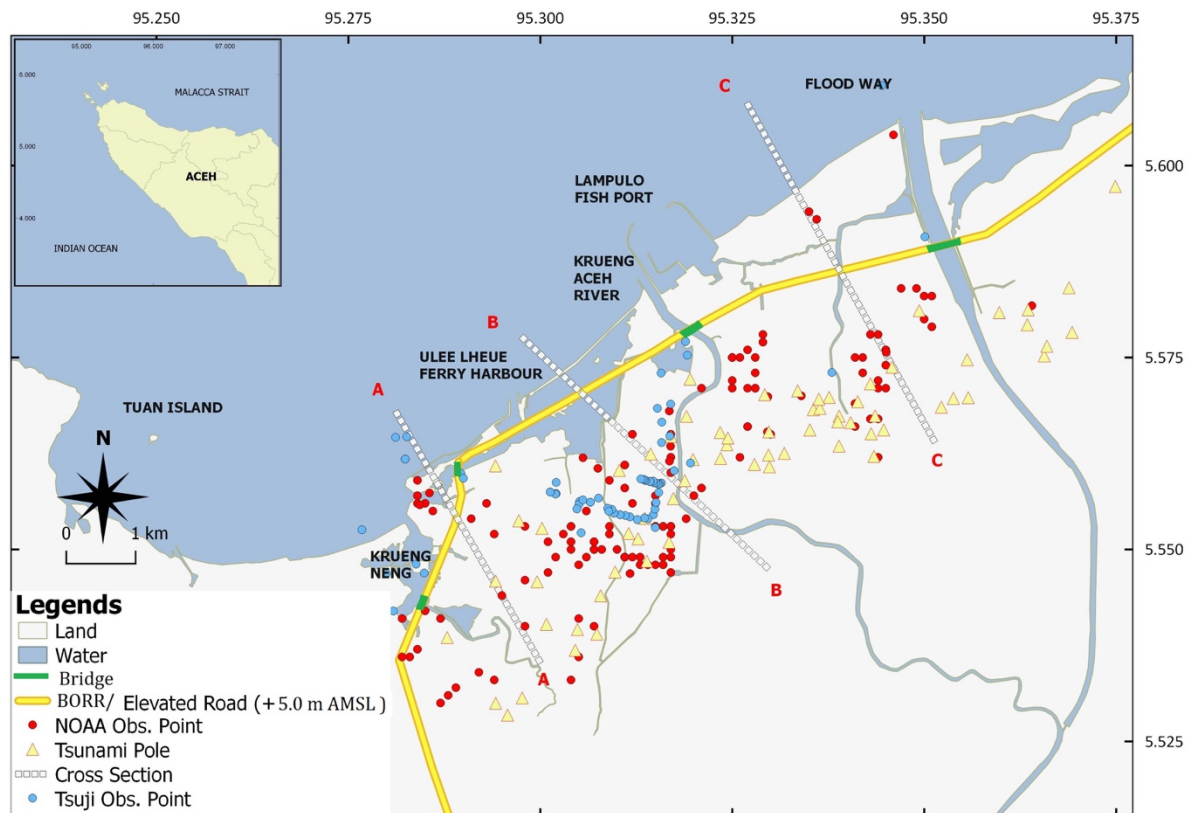

Fig. 1 The study area (revised).

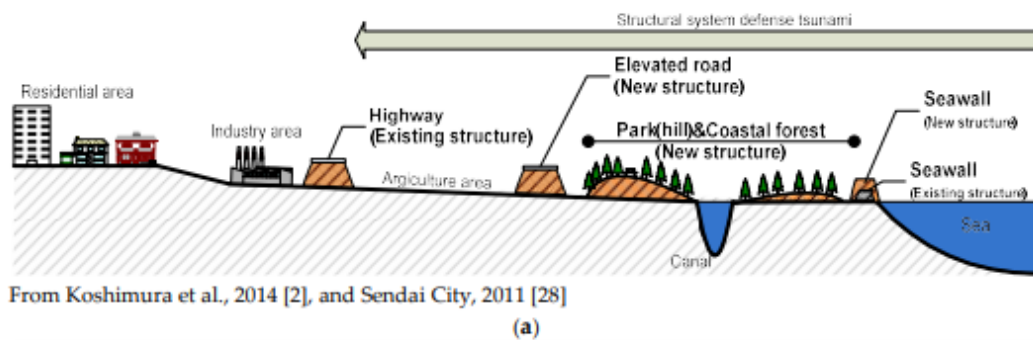

Figure 2. The Multi-layered tsunami defense as depicted by Koshimura et al. (2014)

The equations 4 and 6 that confirm the use of  $\phi$

$$\frac{\partial \eta}{\partial t} + \frac{1}{R \cos \phi} \left\{ \frac{\partial P}{\partial \psi} + \frac{\partial}{\partial \phi} (\cos \phi Q) \right\} = -\frac{\partial h}{\partial t}, \quad (4)$$

$$\frac{\partial Q}{\partial t} + \frac{1}{R \cos \phi} \frac{\partial}{\partial \psi} \left\{ \frac{PQ}{H} \right\} + \frac{1}{R} \frac{\partial}{\partial \phi} \left\{ \frac{Q^2}{H} \right\} + \frac{gH}{R} \frac{\partial \eta}{\partial \phi} + fP + F_y = 0, \quad (6)$$

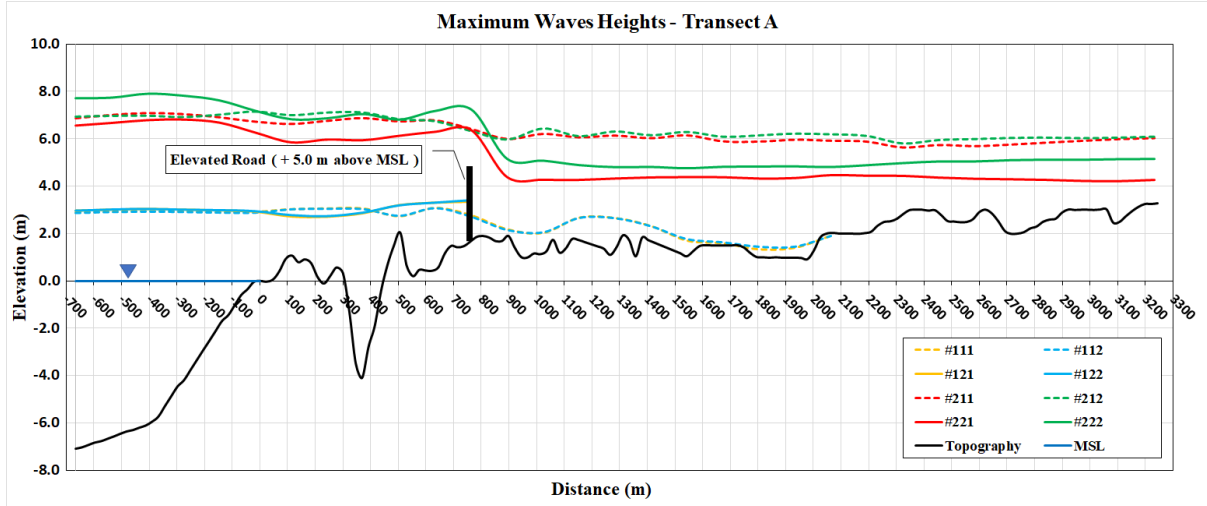

Fig. 3 an example of revised Fig. 12 in the manuscript to show more visible lines and legends. Similar revisions have been done to Transect B and Transec C.

Table 1. Information on the Setup of the six layers for COMCOT Simulations

| Layer | Latitude | Longitude | Number of Grid | Ratio | Grid size (m) | Time Step (sec.) | Manning Roughness Coefficients                                | SWE type  |
|-------|----------|-----------|----------------|-------|---------------|------------------|---------------------------------------------------------------|-----------|
| 1     | 0.1      | 88.1      | 1772           |       | 1856          | 0.1              | none                                                          | Linear    |
|       | 14.93    | 102.8     |                |       |               |                  |                                                               |           |
| 2     | 3        | 91        | 1920           | 2     | 928           | 0.05             | none                                                          | Linear    |
|       | 10       | 100       |                |       |               |                  |                                                               |           |
| 3     | 4.08     | 92.05     | 3899           | 3     | 309.33        | 0.017            | none                                                          | Linear    |
|       | 8.98     | 97.98     |                |       |               |                  |                                                               |           |
| 4     | 5.2708   | 94.51     | 3137           | 3     | 103.11        | 0.006            | none                                                          | Linear    |
|       | 6.695    | 95.99     |                |       |               |                  |                                                               |           |
| 5     | 5.5      | 95.14     | 1426           | 3     | 34.37         | 0.002            | none                                                          | Linear    |
|       | 5.69     | 95.39     |                |       |               |                  |                                                               |           |
| 6     | 5.515    | 95.235    | 2362           | 3     | 11.5          | 0.001            | Variable Manning Roughness Coefficients (see <b>Table 3</b> ) | Nonlinear |
|       | 5.615    | 95.378    |                |       |               |                  |                                                               |           |
